# Supplementary material for: Dirofilaria immitis JYD-34 isolate: whole genome analysis
Source: PubMed Central journal article supplement (PMC5688507; doi:10.1186/s13071-017-2437-5), 2017-11-09
Supplement: 13071_2017_2437_MOESM1_ESM.pdf [file 13071_2017_2437_MOESM1_ESM.pdf]

**1602137 SNPs with FST at least 0**

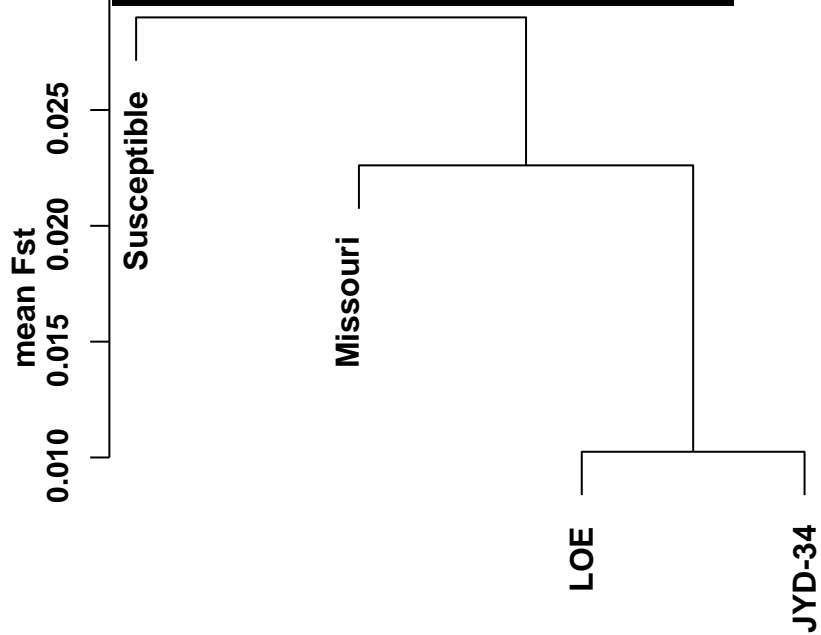

**137454 SNPs with FST at least 0.1**

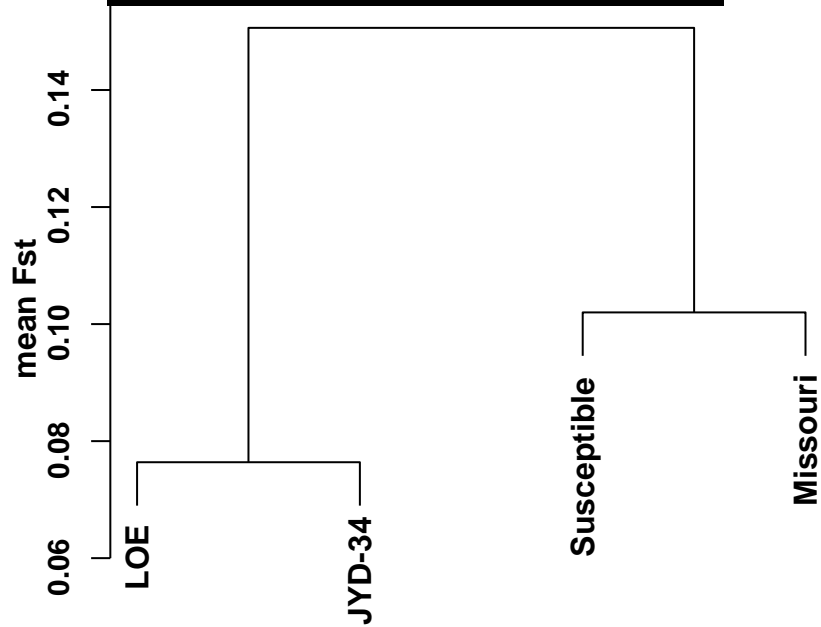

**64983 SNPs with FST at least 0.2**

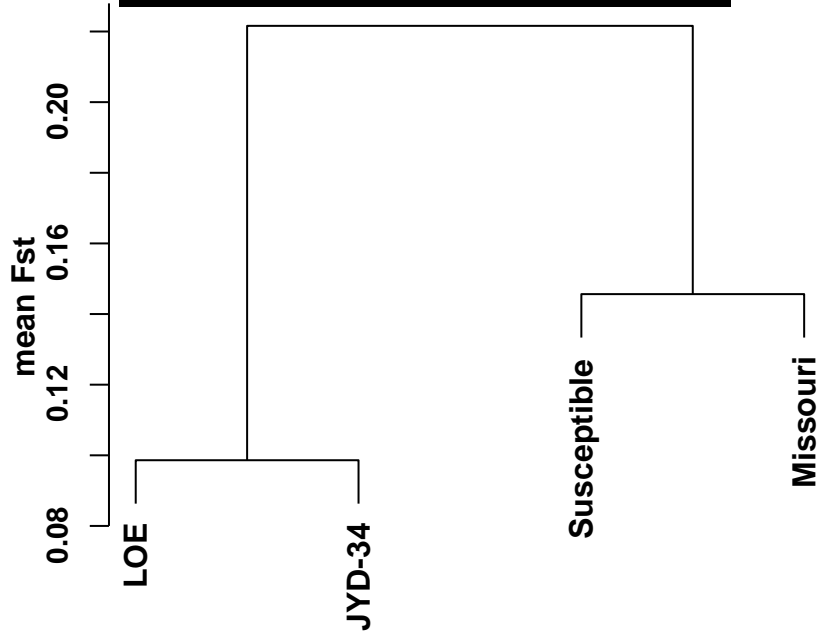

**31254 SNPs with FST at least 0.3**

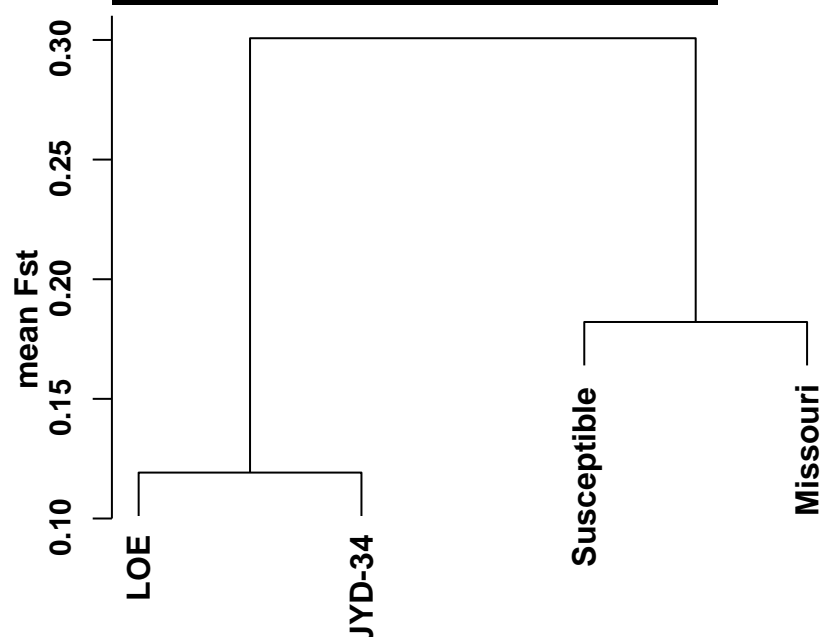

**15970 SNPs with FST at least 0.4**

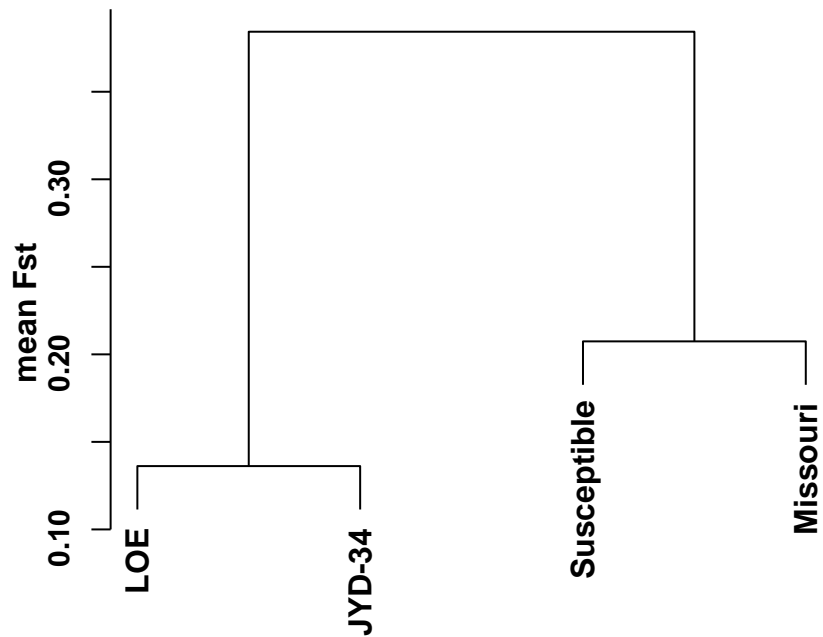

**8135 SNPs with FST at least 0.5**

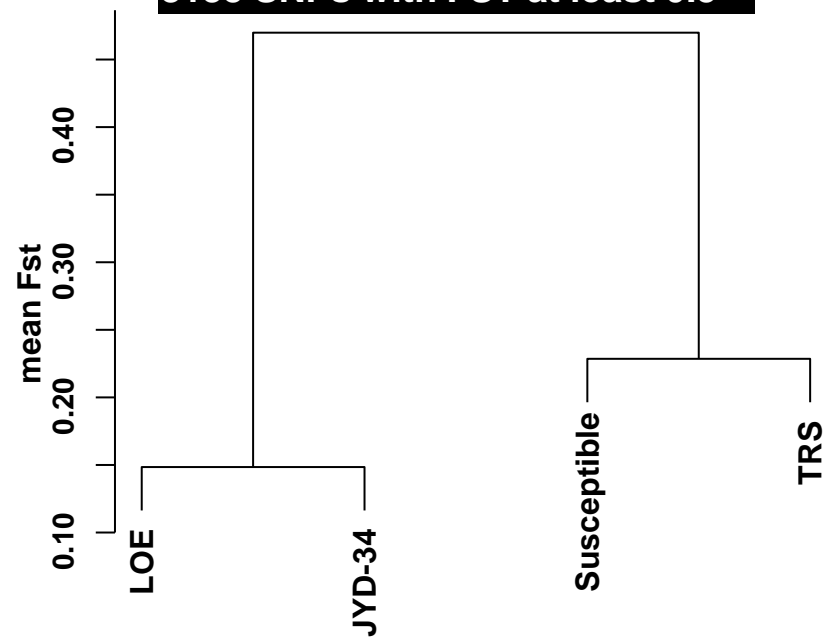

**4026 SNPs with FST at least 0.6**

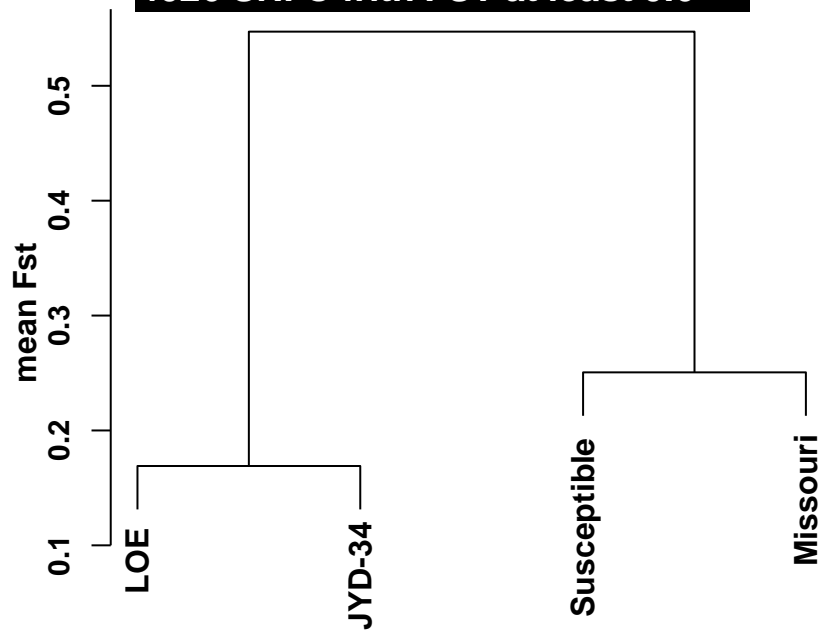

**1654 SNPs with FST at least 0.7**

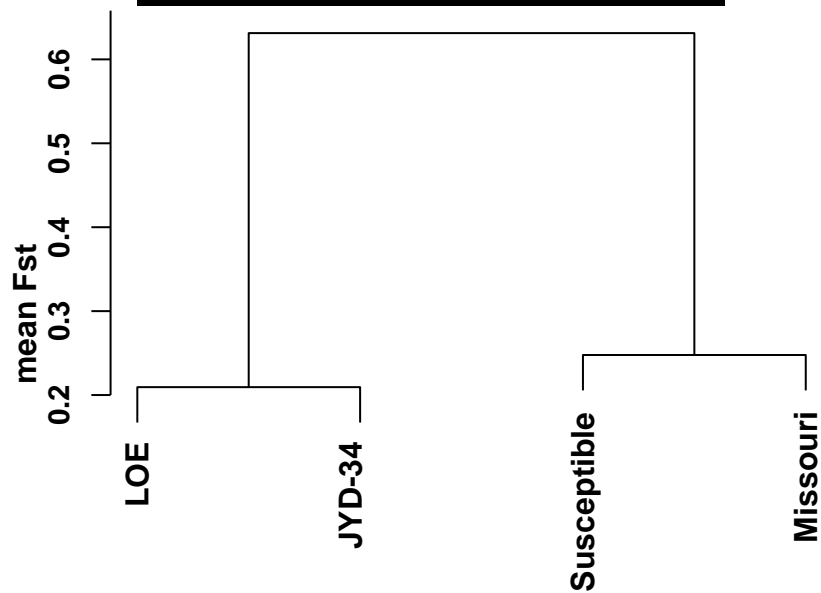

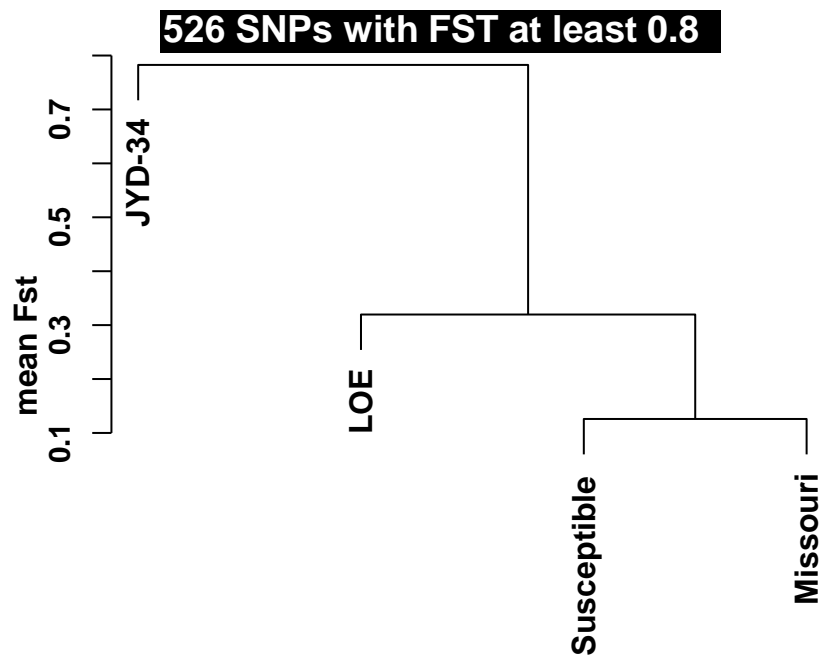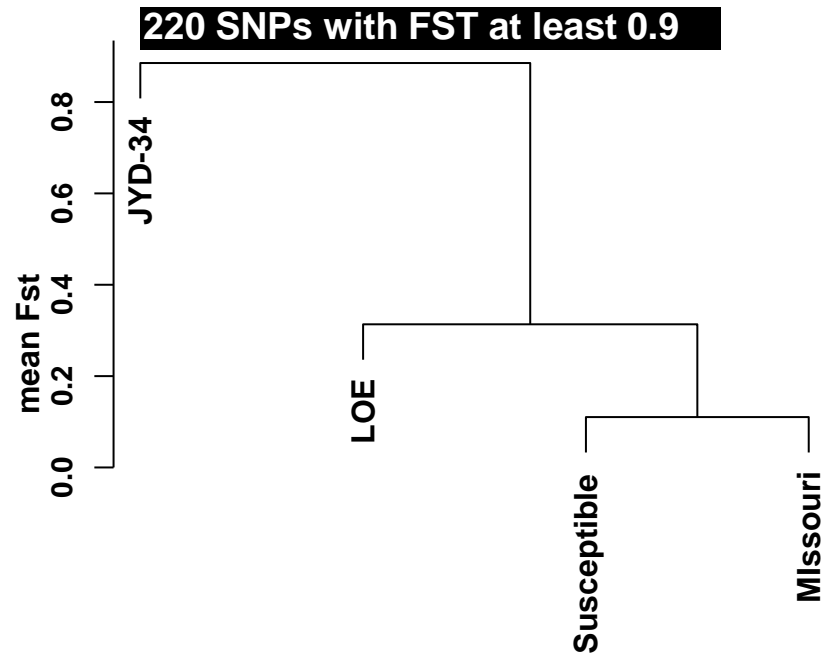

**Additional file 1:** Dendrogram visualization based on means  $F_{ST}$ . The dendrograms illustrate the divergence that exists between JYD-34 isolate and Missouri, Susceptible and LOE isolates, where  $F_{ST} = 0$  means no divergence between two population and  $F_{ST} = 1$  means complete divergence. In this analysis, for each SNP out of the total 1,602,137 SNPs, the  $F_{ST}$  corresponding to each of the different comparisons LOE/Susceptible; LOE/TRS; LOE/JYD; Susceptible/TRS; Susceptible/JYD; and TRS/JYD were calculated. If at least one of these comparisons had an  $F_{ST}$  value of 0.1 or greater, the corresponding SNP and the  $F_{ST}$  for each population comparison were retained in the analysis. Based on this criterion, 137,454 SNPs were kept to calculate the mean  $F_{ST}$  used in the distance matrix that allowed the construction of the dendrogram. Thresholds were progressively increased from 0 to 0.9.
